# Supplementary material for: Cooperative self-assembly and crystallization into fractal patterns by PNIPAM-based nonlinear multihydrophilic block copolymers under alkaline conditions
Source: Royal Society of Chemistry journal article supplement (doi:10.1039/c3py00682d), 2013-01-01
Supplement: c3py00682d.pdf [file c3py00682d.pdf]

## Supporting Information for

# Cooperative self-assembly and crystallization into fractal patterns by PNIPAM-based nonlinear multihydrophilic block copolymers under alkaline conditions

Shengtong Sun,<sup>a</sup> Shengjie Xu,<sup>a</sup> Weidong Zhang,<sup>b</sup> Peiyi Wu,<sup>\*a</sup> Wei Zhang,<sup>\*c</sup> and Xiulin Zhu<sup>\*c</sup>

*a* State Key Laboratory of Molecular Engineering of Polymers, Ministry of Education, Department of Macromolecular Science, and Laboratory of Advanced Materials, Fudan University, Shanghai 200433, China. E-mail: peiyiwu@fudan.edu.cn (Peiyi Wu)

*b* Center for Soft Condensed Matter and Interdisciplinary Research, Soochow University, Suzhou 215006, China.

*c* Jiangsu Key Laboratory of Advanced Functional Polymer Design and Application, Department of Polymer Science and Engineering, College of Chemistry, Chemical Engineering and Materials Science, Soochow University, Suzhou 215123, China. E-mail: weizhang@suda.edu.cn (Wei Zhang); xlzhu@suda.edu.cn (Xiulin Zhu)

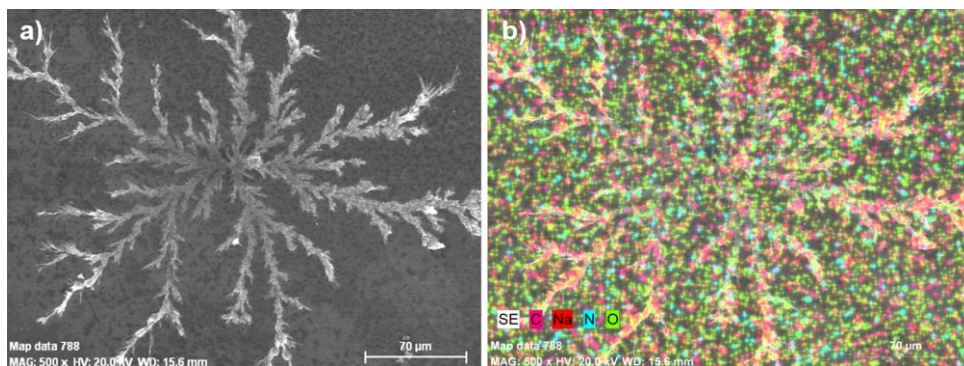

**Fig. S1** FE-SEM image (a) and corresponding elemental mapping data (b) of the fractal pattern from the aqueous solution of (PNIPAM-*b*-PAA)<sub>2</sub>-(PVP)<sub>2</sub> (2 mg/mL) in the presence of NaOH (10 mM) at 20 °C. Wherein, C and N come from polymer chains while Na from NaOH. According to EDX spectra,  $n_N : n_{Na} = 3.7 : 1$ .

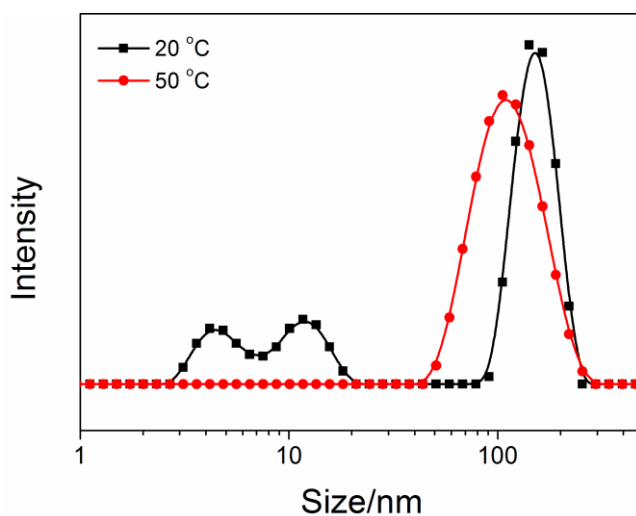

**Fig. S2** Hydrodynamic radii ( $R_h$ ) distributions of  $(\text{PNIPAM-}b\text{-PAA})_2\text{-(PVP)}_2$  in  $\text{H}_2\text{O}$  (2.0 mg/mL, NaOH ~ 10 mM) at 20 °C and 50 °C respectively.

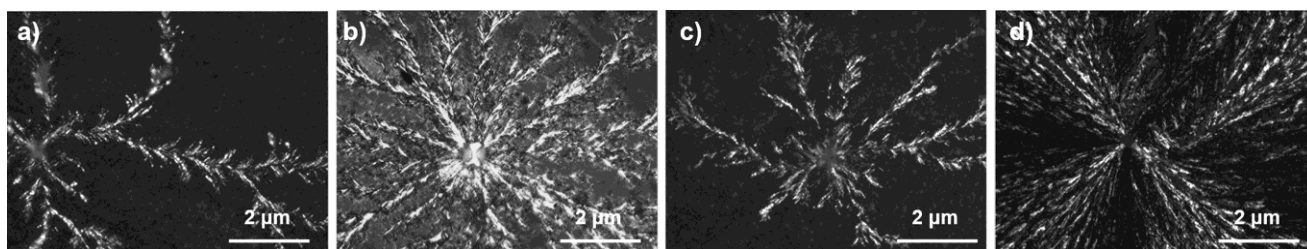

**Fig. S3** POM images of the dried patterns on glass surface from the aqueous solutions of four DHBCs (2 mg/mL) in the presence of NaOH (14 mM). (a)  $(\text{PNIPAM})_2\text{-(PAA)}_2$ ; (b)  $(\text{PNIPAM})_3\text{-PAA}$ ; (c)  $\text{PNIPAM-(PAA)}_3$ ; (d)  $\text{PNIPAM-}b\text{-PAA}$ .
